# Supplementary material
Source: PubMed Central journal article supplement (PMC4040560)
Supplement: 1400036111_pnas.201400036SI.pdf [file 1400036111_pnas.201400036SI.pdf]

# Supporting Information

Ko et al. 10.1073/pnas.1400036111

## SI Methods

**Plasmids.** The pYJ400 series plasmid vectors were generated by introducing the 720-bp upstream region and the 300-bp downstream region of the alcohol dehydrogenase *ADHI* gene into XhoI/HindIII and SacII/SacI sites of the pRS400 series vectors, as described (1). Genes encoding the neuronal SNARE proteins syntaxin-1, SNAP25, and synaptobrevin-2 were cloned by RT-PCR using mRNA prepared from PC-12 cells, digested with EcoRI and SacII, and inserted into the EcoRI and SacII sites of pYJ406, pYJ408, and pYJ406, respectively. The synaptobrevin mutants Syb2-VV, Syb2-GG, Syb2-EE, and Syb2-QQ were generated by PCR with specific primers, and the resulting PCR products were digested with EcoRI and SacII and inserted into the EcoRI and SacII sites of pYJ406. Munc18 was cloned from PC-12 cell mRNA by RT-PCR, digested with HindIII, and inserted into the HindIII site of the plasmid p405TDH3 (Addgene plasmid 15969).

**Yeast Strains.** *Saccharomyces cerevisiae* strains BJ3505 [*Mata ura3-52 trp1-Δ101 his3-Δ200 lys2-801 gal2 (gal3) can1 prb1-Δ1.6R pep4::HIS3*] (2) and DKY6281 (*Mata ura3-52 leu2-3,112 trp1-Δ901 his3-Δ200 lys2-801 suc2-Δ9 pho8::TRP1*) (3), or their derivatives described below, were used to purify vacuoles for in vitro fusion assays. BJ3505 *nyv1Δ::TRP1 snc2Δ::Hygro<sup>R</sup>* was transformed with BsaBI-linearized pYJ406-Syb2 to generate BJ3505 *nyv1Δ snc2Δ* expressing synaptobrevin-2 (BJ-Syb2). DKY6281 *nyv1Δ::HIS3* was transformed with BsaBI-linearized pYJ406-Stx1 and pYJ408-S25 to generate DKY6281 *nyv1Δ* expressing both syntaxin-1 and SNAP-25 (DKY-*Stx1/S25*). The strain DKY-*Stx1/S25* expressing Munc18 (DKY-*Stx1/S25/M18*) was generated by transforming the strain DKY-*Stx1/S25* with XcmI-linearized p405TDH3-Munc18. To generate BJ-Syb2 containing vacuoles with luminal GFP (BJ-Syb2-GFP), BJ-Syb2 was transformed with BsaBI-linearized pYJ400-mel-sGFP (4).

**Reagents.** Anti-syntaxin-1 (Santa Cruz), anti-VAMP2 (Abcam), anti-SNAP25 (Abcam), and anti-Munc18-1 (Santa Cruz) antibodies were purchased. Anti-Sec18p, anti-Vam3p, anti-Vps33p, and anti-Ypt7p antibodies were prepared as described (4) and dialyzed into PS buffer (10 mM Pipes/KOH at pH 6.8 and 200 mM sorbitol) with 125 mM KCl. The concentrations used (unless otherwise noted) were as follows: 0.54 μM affinity-purified anti-Sec18p antibody (5); 1.3 μM affinity-purified anti-Vam3p antibody; 0.48 μM affinity-purified anti-Vps33p antibody; and 11.5 μM affinity-purified anti-Ypt7p antibody. The cytosolic domain of synaptobrevin-2 (Syb2-CD) was produced as a his<sub>6</sub>-fusion from *Escherichia coli* Rosetta 2 (λDE3) (Novagen) bearing pParallel-HIS-Syb2-CD. Full-length his<sub>6</sub>-SNAP25 and his<sub>6</sub>-Munc18 were produced from *E. coli* Rosetta 2 (λDE3) bearing pParallel-HIS-SNAP25 and pParallel-HIS-Munc18, respectively. The his<sub>6</sub>-tagged botulinum neurotoxin serotype E light chain (BoNT/E LC) was produced from *E. coli* Rosetta 2 (λDE3) bearing pParallel-HIS-BoNT/E-LC. These proteins were pre-

pared as described (6). His<sub>6</sub>-Gyp1-46p and Gdi1p (GDI) were prepared as described (4, 7). MARCKS effector domain (MED) (8) was custom-synthesized by ANYGEN (Gwangju) and dissolved in PS buffer. Purified recombinant proteins were dialyzed into PS buffer with 125 mM KCl and used at the following concentrations: 5 μM his<sub>6</sub>-Gyp1-46p, 3 μM GDI, 2 μM Syb2-CD, and 20 μM MED, unless otherwise noted.

**Extraction and Measurement of Vacuolar Lipids.** Vacuolar lipids were extracted by a modification of the Bligh-Dyer method (9), as described (10). Briefly, chloroform (100 μL) and methanol supplemented with 0.1 M HCl (200 μL) were added to 37 μg of vacuoles, as measured by protein content, in 80 μL of PS buffer, mixed thoroughly by vortexing, and incubated at room temperature (RT) for 1 h. After PS buffer (100 μL) and chloroform (100 μL) were added, the sample was vortexed thoroughly and centrifuged at 14,000 × *g* at RT for 30 s. The organic layer was transferred to a 13 × 100 mm bound-bottom glass tube. Chloroform (200 μL) was added to the remaining aqueous layer, the mixture was vortexed and centrifuged as above, and the organic layer was removed and added to the organic layer from the first extraction. PS buffer (360 μL) and methanol-HCl (400 μL) were added to the combined organic layers. This mixture was vortexed thoroughly and centrifuged at RT for 30 s, and the aqueous layer was removed by aspiration. The organic layer was then dried in a Sorvall Speed-Vac SC100 (Thermo Fisher Scientific) and used for estimation of vacuole lipid levels. Vacuole lipid levels were measured by using a lipid phosphorous assay. Ten microliters of 2% (wt/vol) ammonium molybdate was added to extracted vacuolar lipids and to standards (0, 5, 10, 25, 50, 75, 100, and 125 μL of a 1 mM NaH<sub>2</sub>PO<sub>4</sub> solution). Samples were dried completely in Speed-Vac. After the addition of perchloric acid [300 μL of a 70% (vol/vol) solution], samples were incubated at 180 °C for 30 min, and then cooled to RT. Ammonium molybdate (1.5 mL of a 0.4% solution) and ascorbic acid [225 μL of a 10% (wt/vol) solution] were added. The mixture were incubated at 90 °C for 10 min, then and cooled to RT. Absorbance at 820 nm was measured, and phospholipid concentration was estimated by comparing vacuole lipid samples to NaH<sub>2</sub>PO<sub>4</sub> standards. To obtain the lipid concentrations shown in Table S1, measured phospholipid concentrations were multiplied by 1.18 to correct for a reported ergosterol:phospholipid molar ratio of 0.18 in vacuolar lipids (11), as described (10).

**Measurement of Vacuolar SNARE Levels.** For estimation of vacuolar SNARE levels, BJ3505, DKY6281, BJ-Syb2, and DKY-*Stx1/S25* vacuoles were analyzed by SDS/PAGE and immunoblotting for Vam7p, Vam3p, Vti1p, Nyv1p, synaptobrevin-2, syntaxin-1, and SNAP25. Protein levels were estimated by comparing band intensities from vacuolar samples to band intensities from standards of purified recombinant Vam7p, Vam3p, Vti1p, Nyv1p (12), his<sub>6</sub>-Syb2-CD, his<sub>6</sub>-tagged syntaxin-1 cytosolic domain, and his<sub>6</sub>-SNAP25.

1. Jun Y, Wickner W (2007) Assays of vacuole fusion resolve the stages of docking, lipid mixing, and content mixing. *Proc Natl Acad Sci USA* 104(32):13010–13015.
2. Jones EW (2002) Vacuolar proteases and proteolytic artifacts in *Saccharomyces cerevisiae*. *Meth Enzymol* 351:127–150.
3. Haas A, Conradt B, Wickner W (1994) G-protein ligands inhibit in vitro reactions of vacuole inheritance. *J Cell Biol* 126(1):87–97.
4. Starai VJ, Jun Y, Wickner W (2007) Excess vacuolar SNAREs drive lysis and Rab bypass fusion. *Proc Natl Acad Sci USA* 104(34):13551–13558.
5. Thornogren N, Collins KM, Fratti RA, Wickner W, Merz AJ (2004) A soluble SNARE drives rapid docking, bypassing ATP and Sec17/18p for vacuole fusion. *EMBO J* 23(14):2765–2776.

6. Jun Y, et al. (2006) Reversible, cooperative reactions of yeast vacuole docking. *EMBO J* 25(22):5260–5269.
7. Wang C-W, Stromhaug PE, Kauffman EJ, Weisman LS, Klionsky DJ (2003) Yeast homotypic vacuole fusion requires the Ccz1-Mon1 complex during the tethering/docking stage. *J Cell Biol* 163(5):973–985.
8. Fratti RA, Jun Y, Merz AJ, Margolis N, Wickner W (2004) Interdependent assembly of specific regulatory lipids and membrane fusion proteins into the vertex ring domain of docked vacuoles. *J Cell Biol* 167(6):1087–1098.
9. Bligh EG, Dyer WJ (1959) A rapid method of total lipid extraction and purification. *Can J Biochem Physiol* 37(8):911–917.

10. Zick M, Stroupe C, Orr A, Douville D, Wickner WT (2014) Membranes linked by trans-SNARE complexes require lipids prone to non-bilayer structure for progression to fusion. *Elife* 3:e01879.
11. Zinser E, et al. (1991) Phospholipid synthesis and lipid composition of subcellular membranes in the unicellular eukaryote *Saccharomyces cerevisiae*. *J Bacteriol* 173(6): 2026–2034.

12. Jun Y, Xu H, Thorngren N, Wickner W (2007) Sec18p and Vam7p remodel trans-SNARE complexes to permit a lipid-anchored R-SNARE to support yeast vacuole fusion. *EMBO J* 26(24):4935–4945.

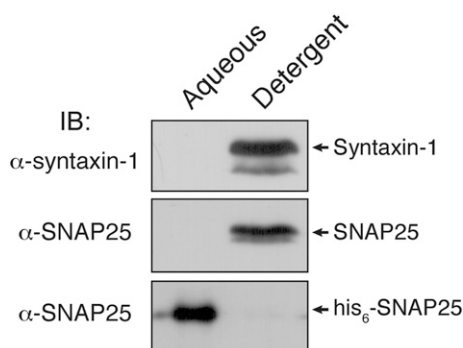

**Fig. S1.** Yeast-expressed vacuolar SNAP25 appears to be palmitoylated. Triton X-114 phase partitioning analysis of the hydrophobicity of yeast-expressed vacuolar SNAP25, his<sub>6</sub>-SNAP25 expressed in *E. coli*, and yeast-expressed vacuolar syntaxin-1 with its transmembrane anchor was performed with DKY-*Stx1/S25* vacuoles supplemented with recombinant his<sub>6</sub>-SNAP25, as described (1).

1. Bordier C (1981) Phase separation of integral membrane proteins in Triton X-114 solution. *J Biol Chem* 256(4):1604–1607.

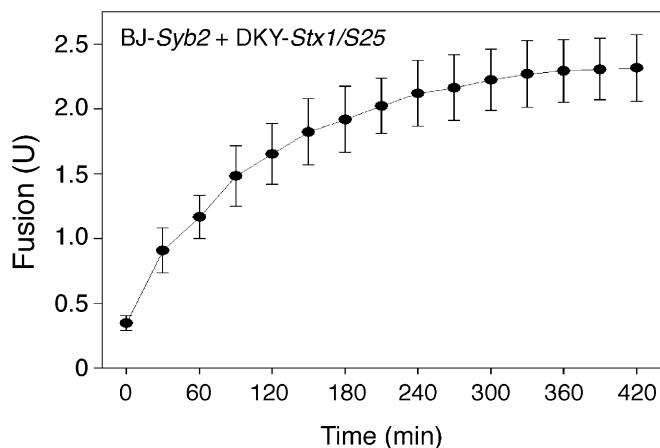

**Fig. S2.** Kinetics of neuronal SNARE-mediated vacuole fusion. BJ-*Syb2* vacuoles and DKY-*Stx1/S25* vacuoles were mixed and incubated in fusion reaction buffer (without ATP) at 27 °C. A portion of the reaction (30 μL) was transferred to ice at the times indicated. After 420 min, the activity of ALP was measured. The results are the mean of three independent experiments ± SEM.





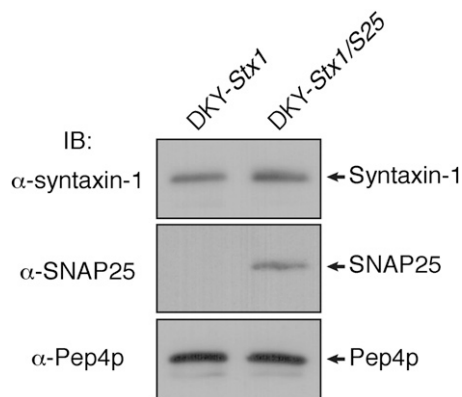

**Fig. S7.** The amount of vacuolar syntaxin-1 was comparable between DKY-*Stx1* and DKY-*Stx1/S25* vacuoles. Vacuoles were isolated from the DKY-*Stx1* and DKY-*Stx1/S25*, and protein compositions were analyzed by immunoblotting.

**Table S1. Protein abundance, relative to lipids, in normal vacuoles or neuronal SNARE-expressing vacuoles**

| Protein         | Molar ratio of lipid:protein on vacuoles* |                     |                    |                      |
|-----------------|-------------------------------------------|---------------------|--------------------|----------------------|
|                 | BJ3505                                    | DKY6281             | BJ- <i>Syb2</i>    | DKY- <i>Stx1/S25</i> |
| Vam3p           | $1.61 \times 10^5$                        | $3.47 \times 10^5$  | —                  | —                    |
| Vti1p           | $2.77 \times 10^5$                        | $7.36 \times 10^5$  | —                  | —                    |
| Vam7p           | $8.31 \times 10^5$                        | $10.58 \times 10^5$ | —                  | —                    |
| Nyv1p           | $11.8 \times 10^5$                        | $13.6 \times 10^5$  | —                  | —                    |
| Synaptobrevin-2 | —                                         | —                   | $2.59 \times 10^4$ | —                    |
| Syntaxin-1      | —                                         | —                   | —                  | $4.96 \times 10^4$   |
| SNAP25          | —                                         | —                   | —                  | $16.0 \times 10^4$   |

\*Based on measured (*SI Materials and Methods*) values of 2.08 nmol lipid per  $\mu\text{g}$  of total vacuole protein for BJ3505 vacuoles, 2.34 nmol lipid per  $\mu\text{g}$  of total vacuole protein for DKY6281 vacuoles, 2.23 nmol lipid per  $\mu\text{g}$  of total vacuole protein for BJ-*Syb2* vacuoles, and 2.35 nmol lipid per  $\mu\text{g}$  of total vacuole protein for DKY-*Stx1/S25* vacuoles.
